# Supplementary material for: HLA-E and Its Soluble Form as Indicators of a Sex-Specific Immune Response in Patients with Oral Squamous Cell Carcinoma
Source: Int J Mol Sci. 2023 Nov 24;24(23):16699. doi: 10.3390/ijms242316699 (PMC10706335; doi:10.3390/ijms242316699)
Supplement: Supplementary file 1 [file ijms-24-16699-s001.zip › ijms-2707947-supplementary.pdf]

# HLA-E and its soluble form as indicators of a sex-specific immune response in patients with Oral Squamous Cell Carcinoma

Anne Radermacher, Michael Fehrenz, Tamara Bellin, Carolina Claßen, Laura Möller, Ann-Kristin Struckmeier, Mathias Wagner, Philipp Wartenberg, Julius Moratin, Christian Freudlsperger, Kolja Freier, Dominik Horn

**Table S1:** Descriptive statistics on age distribution of tumor group of the ELISA collective

| Characteristics | N  | Minimum | Maximum | Mean  | SD     |
|-----------------|----|---------|---------|-------|--------|
| Age             | 29 | 48      | 93      | 65.79 | 12.219 |

**Table S2:** Descriptive statistics on age distribution of control group of the ELISA collective

| Characteristics | N  | Minimum | Maximum | Mean | SD   |
|-----------------|----|---------|---------|------|------|
| Age             | 41 | 20      | 86      | 59   | 15.1 |

**Table S3:** Kolmogorov-Smirnov and Shapiro-Wilk-test of normal distribution of ELISA group

|           | Kolmogorov-Smirnov |    |              | Shapiro-Wilk |    |              |
|-----------|--------------------|----|--------------|--------------|----|--------------|
|           | Statistics         | Df | Significance | Statistics   | Df | Significance |
| sHLA-E-OD | 0.12               | 74 | 0.020        | 0.923        | 74 | <0.001       |

**Table S4:** Spearman's correlation of the clinicopathological parameters sex, age, N-classification and UICC-Stage with sHLA-E levels of the ELISA collective

| Characteristics  | Spearman's Rho | p-value |
|------------------|----------------|---------|
| Sex              | 0.357          | 0.045*  |
| Age              | 0.202          | 0.294   |
| T-classification | 0.068          | 0.711   |
| N-classification | -0.115         | 0.546   |
| UICC-Stage       | 0.031          | 0.869   |

Abbreviations: UICC= Union Internationale Contre le Cancer, \*= p-value < 0.05

**Table S5: Mann-Whitney-U-Test.** Compares mean ranks of sHLA-E-levels of the tumor group between male and female patients

| Factor               | Groups compared | N  | Mean Rank | Mann-Whitney-U | W     | p-value (exact) |
|----------------------|-----------------|----|-----------|----------------|-------|-----------------|
| sHLA-E concentration | Men OSCC        | 18 | 13.64     | 177.5          | 282.5 | 0.049*          |
|                      | Women OSCC      | 14 | 20.18     |                |       |                 |

\*= p-value < 0.05

**Table S6:** Mann-Whitney-U-Test. Compares mean ranks of sHLA-E-levels of the control group between male and female patients

| Factor               | Groups compared   | N  | Mean Rank | Mann-Whitney-U | W     | p-value (exact) |
|----------------------|-------------------|----|-----------|----------------|-------|-----------------|
| sHLA-E concentration | Men Control group | 22 | 22.48     | 198.5          | 408.5 | 0.587           |
|                      | Women Tumor group | 20 | 20.43     |                |       |                 |

**Table S7:** Mann-Whitney-U-Test. Compares mean ranks of sHLA-E-levels of the tumor group and the control group

| Factor               | Groups compared | N  | Mean Rank | Mann-Whitney-U | W   | p-value (exact) |
|----------------------|-----------------|----|-----------|----------------|-----|-----------------|
| sHLA-E concentration | Tumor group     | 32 | 30.91     | 461            | 989 | 0.021*          |
|                      | Control group   | 42 | 40.52     |                |     |                 |

\*= p-value < 0.05

**Table S8:** Mann-Whitney-U-Test. Compares mean sHLA-E-levels of males of tumor group and males of control group

| Factor               | Groups compared   | N  | Mean Rank | Mann-Whitney-U | W     | p-value (exact) |
|----------------------|-------------------|----|-----------|----------------|-------|-----------------|
| sHLA-E concentration | Men Tumor group   | 18 | 14.14     | 312.5          | 565.5 | 0.001*          |
|                      | Men Control group | 22 | 25.7      |                |       |                 |

\*= p-value < 0.05

**Table S9:** Mann-Whitney-U-Test. Compares mean sHLA-E-levels of females of tumor group and males of control group

| Factor               | Groups compared     | N  | Mean Rank | Mann-Whitney-U | W   | p-value (exact) |
|----------------------|---------------------|----|-----------|----------------|-----|-----------------|
| sHLA-E concentration | Women Tumor group   | 14 | 17.29     | 134            | 353 | 0.916           |
|                      | Women Control group | 20 | 17.65     |                |     |                 |
